# Supplementary material
Source: PubMed Central journal article supplement (PMC1356310)
Supplement: 7600870s3.pdf [file 7600870s3.pdf]

# Supplementary Figure 3

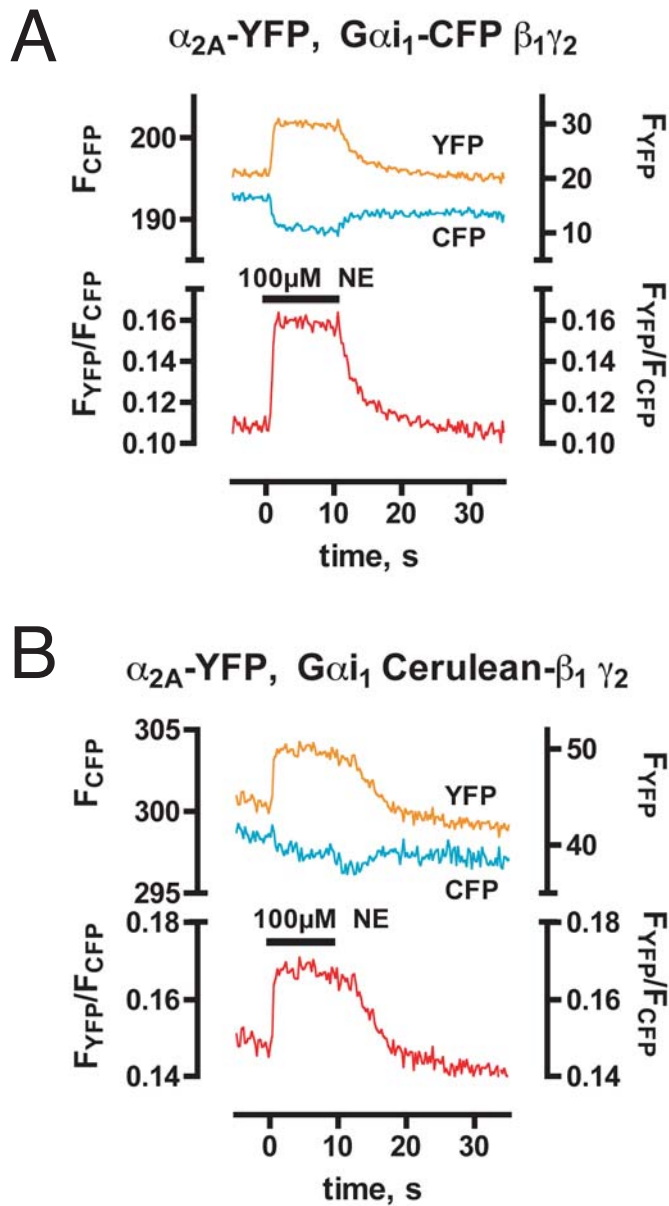

(A) Agonist-dependent FRET signal of cells transfected with  $\alpha_{2A}$ -YFP and G $\alpha_{i1}$ -CFP  $\beta_1\gamma_2$ . (B) Agonist-dependent FRET signal of cells transfected with  $\alpha_{2A}$ -YFP and G $\alpha_{i1}$  Cerulean  $\beta_1 \gamma_2$ .
