# Supplementary material
Source: PubMed Central journal article supplement (PMC1356310)
Supplement: 7600870s4.pdf [file 7600870s4.pdf]

## Supplementary Figure 4

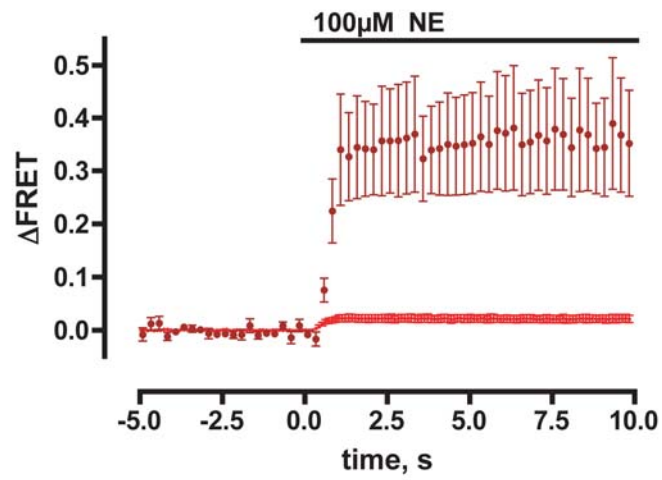

Average  $\pm$  s.e.m. of FRET traces of cells transfected with  $\alpha_{2A}$ -YFP,  $G\beta_1$ , CFP- $\gamma_2$  and  $G\alpha i_1$  ND (dark red; n=6) upon stimulation with 100  $\mu$ M NE. Averaged wild-type data from Figure 1D (light red, n=8) are shown again for comparison.
