# Supplementary material
Source: PubMed Central journal article supplement (PMC1356310)
Supplement: 7600870s5.pdf [file 7600870s5.pdf]

### Supplementary figure 1:

Control experiments. (A) GIRK channel activation kinetics mediated via  $\alpha_{2A}$ -YFP-AR were not significantly different from kinetics obtained using wild-type receptors (n=4-5, sample traces shown). (B) Colocalization of a membrane-anchored YFP (mYFP, left) with  $G\alpha_i\beta_1$  CFP- $\gamma_2$  (right) at the cell membrane (scale bar: 5 $\mu$ m). (C) Upon agonist stimulation of cells transfected with mYFP and  $G\alpha_i\beta_1$  CFP- $\gamma_2$ , no change in FRET was detectable. (D) Averaged FRET traces $\pm$ s.e.m of cells transfected with constitutive active  $G\alpha_i$  (Q204L, open circles, n=15) upon stimulation with 100 $\mu$ M NE. Averaged wild-type data from Figure 1D (filled circles, n=8) are shown again for comparison.

### Supplementary figure 2:

Inactivated Gi proteins interact with receptors. After cotransfection of PTX-sensitive  $G\alpha_i$  subunits with  $\alpha_{2A}$ -YFP-AR and  $G\beta_1$  CFP- $\gamma_2$ , cells were treated with 50ng/ml PTX for 4h. An agonist-induced increase in FRET was detected, which was not significantly different from non-PTX-treated cells (representative experiment out of 10).

### Supplementary figure 3:

(A) Agonist-dependent FRET signal of cells transfected with  $\alpha_{2A}$ -YFP and  $G\alpha_i$ -CFP  $\beta_1\gamma_2$ . (B) Agonist-dependent FRET signal of cells transfected with  $\alpha_{2A}$ -YFP and  $G\alpha_i$  Cerulean - $\beta_1\gamma_2$ .

### Supplementary figure 4:

Average $\pm$ s.e.m. of FRET traces of cells transfected with  $\alpha_{2A}$ -YFP,  $G\beta_1$  CFP- $\gamma_2$  and  $G\alpha_i$  ND (dark red; n=6) upon stimulation with 100 $\mu$ M NE. Averaged wild-type data from Figure 1D (light red, n=8) are shown again for comparison.
